# Supplementary material for: Generation of Adrenal Chromaffin-like Cells from Human Pluripotent Stem Cells
Source: PubMed Central journal article supplement — Stem Cell Reports. 2017 Dec 7;10(1):134–50. doi: 10.1016/j.stemcr.2017.11.003 (PMC5768882; doi:10.1016/j.stemcr.2017.11.003), 2017-12-07
Supplement: mmc1.pdf [file mmc1.pdf]

**Stem Cell Reports, Volume 10**

**Supplemental Information**

**Generation of Adrenal Chromaffin-like Cells from Human Pluripotent  
Stem Cells**

**Kwaku Dad Abu-Bonsrah, Dongcheng Zhang, Andrew R. Bjorksten, Mirella  
Dottori, and Donald F. Newgreen**

## **Supplementary Information**

### **Generation of Adrenal Chromaffin-like Cells from Human Pluripotent Stem Cells.**

Kwaku Dad Abu-Bonsrah<sup>1,2</sup>, Dongcheng Zhang<sup>1</sup>, Andrew R. Bjorksten<sup>3</sup>, Mirella Dottori<sup>2,4</sup>, Donald F. Newgreen<sup>1\*</sup>

<sup>1</sup> The Murdoch Children's Research Institute, Royal Children's Hospital, Parkville 3052, Victoria, Australia.

<sup>2</sup> Centre for Neural Engineering, University of Melbourne, Parkville 3010, Victoria, Australia.

<sup>3</sup> Department of Anaesthesia and Pain Management, The Royal Melbourne Hospital Grattan Street, Parkville 3052, Victoria, Australia

<sup>4</sup> Department of Anatomy and Neurosciences, University of Melbourne, Parkville 3010, Victoria, Australia

\*corresponding author- [don.newgreen@mcri.edu.au](mailto:don.newgreen@mcri.edu.au)

**Supplementary Table S1. qPCR Primers**

| <b>Target Name</b>            | <b>Target type</b>                 | <b>Target size</b> | <b>Target Sequence</b>                                    |
|-------------------------------|------------------------------------|--------------------|-----------------------------------------------------------|
| <i>SOX10</i>                  | NC lineage (not neurons)           | 214 bp             | F: TCTGGAGGCTGCTGAACGAA<br>R: AAGTGGGCGCTCTTGTAGTG        |
| <i>ASCL1</i>                  | SAP marker                         | 188 bp             | F: TCCCCCAACTACTCCAACGA<br>R: GCGATCACCTGCTTCCAAA         |
| <i>MYCN</i>                   | SAP marker                         | 123 bp             | F: GAGAGGACACCCTGAGCGATTCA<br>R: ATGTGGTGACAGCCTTGGTGTGG  |
| <i>PHOX2B</i>                 | SAP marker                         | 88 bp              | F: ACGCCGCAGTTCCTTACAAA<br>R: CTGGTGAAAGTGGTGCGGAT        |
| <i>HAND2</i>                  | SAP marker                         | 105 bp             | F: GGCAGAGATCAAGAAGACCGAC<br>R: CGGCCTTTGGTTTTCTTGTCGTT   |
| <i>RET</i>                    | Neurotrophic factor receptor       | 200 bp             | F: GAGGAGAGACTACTTGGACCTTG<br>R: GGGGACAGCGGTGCTAGAAT     |
| <i><math>\alpha</math>-TH</i> | CA synth. enzyme                   | 196 bp             | F: GTGTTCCAGTGCACCCAGTA<br>R: ACCAGTACAGCGTGGACAGCTTCT    |
| <i>D<math>\beta</math>H</i>   | CA synth. enzyme                   | 139 bp             | F: GCCATCCATTTCCAGCTCCT<br>R: TCCAGGCGTCCGCAAAATAG        |
| <i>PNMT</i>                   | Chromaffin-spec. adrenaline enzyme | 200 bp             | F: GCCTACCTCCGCAACAATA<br>R: GTCATGGTGATGTCCTCAAAGT       |
| <i>HOXB1</i>                  | Hindbrain positional               | 143 bp             | F: TGCCCTTCAGAACCTAACACCC<br>R: AGCTGCCTTGTGGTGAAGTTGG    |
| <i>HOXB2</i>                  | Hindbrain positional               | 75 bp              | F: GGCCTCTCCCCTAGCCTACA<br>R: GGTGAAAAAATCCAGCTCTTCCT     |
| <i>HOXB3</i>                  | Hindbrain positional               | 106 bp             | F: CCTTCGTCATGAATGGGATCTG<br>R: ATATTCACATCGAGCCCCAGAG    |
| <i>HOXB4</i>                  | Hindbrain/vagal positional         | 95 bp              | F: GAGCACGGTAAACCCCAATTAC<br>R: GAAATTCCTTCTCCAGCTCCAA    |
| <i>OCT4</i>                   | Pluripotency marker                | 131 bp             | F: AAAGCTCTGCAGAAAGAACTCG<br>R: GTCGTTTGGCTGAATACCTTCC    |
| <i>SOX2</i>                   | Pluripot. & CNP marker             | 220 bp             | F: ATGGACAGTTACGCGCACAT<br>R: GCTGCGAGTAGGACATGCTG        |
| <i>GATA3</i>                  | SAP marker                         | 131 bp             | F: TAACATCGACGGTCAAGGCAAC<br>R: GTAGGGATCCATGAAGCAGAGG    |
| <i><math>\beta</math>2M</i>   | Housekeeping                       | 86 bp              | F: TGCTGTCTCCATGTTTGATGTATCT<br>R: TCTCTGCTCCCCACCTCTAAGT |

|              |              |        |                           |
|--------------|--------------|--------|---------------------------|
| <i>GAPDH</i> | Housekeeping | 131 bp | F: GTCTCCTCTGACTTCAACAGCG |
|              |              |        | R: ACCACCCTGTTGCTGTAGCCAA |

**Supplementary Table S2.** Primary and secondary antibodies, and probes.

| Primary antibodies                                     | Target type                           | Host / Isotype          | Company           | Dilution                         |
|--------------------------------------------------------|---------------------------------------|-------------------------|-------------------|----------------------------------|
| Anti-Human SOX10                                       | NC lineage (not neurons)              | Goat Polyclonal         | R&D systems       | 1:200                            |
| Anti-p75NTR (D4B3) XP® Rabbit mAb #8238                | NC lineage                            | Rabbit polyclonal       | Cell Signalling   | 1:1500                           |
| Anti-HNK1                                              | NC lineage                            | Mouse IgM               | MCRI              | 1:200                            |
| Anti-AP2α (3B5)                                        | NC lineage                            | Mouse IgG2b             | DSHB              | 1:200                            |
| Anti-GD2 (clone 14.G2a)                                | SAP marker                            | Mouse IgG <sub>2a</sub> | BD Biosciences    | 0.5 µg / 1x10 <sup>6</sup> cells |
| Anti-MASH1/Achaete-scute homolog 1 antibody (ab38556)  | SAP marker                            | Rabbit polyclonal       | Abcam             | 1:500                            |
| Anti-Peripherin (clone 8G2)                            | SAP & neuron marker                   | Mouse IgG               | Millipore         | 1:500                            |
| Anti-SA1                                               | SAP lineage marker                    | Mouse IgG               | DSHB              | 1:20                             |
| Anti-B2B1                                              | Symp. neuron lineage                  | Mouse IgM               | DSHB              | 1:20                             |
| Anti-Ki67 (AFFN-KI67-3E6)                              | Proliferative marker                  | Mouse IgG2b             | DSHB              | 1:50                             |
| Anti-Neurofilament Heavy antibody (NF421)              | Neuron marker                         | Mouse IgG1              | Abcam             | 1:500                            |
| Anti-Neurofilament M (145 kDa) Antibody                | “                                     | Rabbit polyclonal       | Millipore         | 1:2000                           |
| Anti-TH                                                | Neuron CA synth. enz.                 | Chicken polyclonal      | Abcam             | 1:1500                           |
| Anti-TH                                                | Neuron CA synth. enz.                 | Rabbit polyclonal       | Novus Biologicals | 1:1500                           |
| Anti-Chromogranin B (ab12242)                          | Neuroendocrine marker.<br>LDCV        | Rabbit polyclonal       | Abcam             | 1:700                            |
| Anti-Chromogranin C (ab12241)                          | Neuroendocrine marker.<br>LDCV        | Rabbit polyclonal       | Abcam             | 1:700                            |
| Anti-PNMT                                              | Chromaffin-spec.<br>adrenaline enzyme | Rabbit polyclonal       | ThermoFisher Sci. | 1:700                            |
| Anti-Human Nuclear Antigen antibody [235-1] (ab191181) | Human-specific marker                 | Mouse monoclonal IgG    | Abcam             | 1:200                            |
| Anti-Mitochondria antibody [113-1] (ab92824)           | Human-specific marker                 | Mouse monoclonal IgG    | Abcam             | 1:1500                           |
| Phospho-Smad1/5 (Ser463/465) (41D10)                   | BMP signaling                         | Rabbit monoclonal       | Cell Signalling   | 1:100                            |
| <b>Secondary antibodies</b>                            |                                       |                         |                   |                                  |
| Anti-Goat IgG:Alexa 488                                |                                       | Donkey                  | ThermoFisher Sci. | 1:1000                           |
| Anti-Goat IgG:Alexa 594                                |                                       | Donkey                  | ThermoFisher Sci. | 1:1000                           |
| Anti-Goat IgG:Alexa 647                                |                                       | Donkey                  | ThermoFisher Sci. | 1:1000                           |
| Anti-Sheep IgG:Alexa 594                               |                                       | Donkey                  | ThermoFisher Sci. | 1:1000                           |

|                                    |                      |                      |                   |
|------------------------------------|----------------------|----------------------|-------------------|
| Anti-Rabbit IgG Alexa 488          | Donkey               | ThermoFisher Sci.    | 1:1000            |
| Anti-Rabbit IgG Alexa 594          | Donkey               | ThermoFisher Sci.    | 1:1000            |
| Anti-Rabbit IgG Alexa 633          | Goat                 | ThermoFisher Sci.    | 1:1000            |
| Anti-Mouse IgG-specific:Alexa 488  | Goat                 | ThermoFisher Sci.    | 1:1000            |
| Anti-Mouse IgM- specific:Alexa 488 | Goat                 | ThermoFisher Sci.    | 1:1000            |
| Anti-Mouse IgG+M Alexa 594         | Donkey               | Mol. Probes (A21203) | 1:1000            |
| Anti-Mouse IgG Alexa 647           | Donkey               | ThermoFisher Sci.    | 1:1000            |
| Anti-Chick IgY Alexa 488           | Goat                 | ThermoFisher Sci.    | 1:1000            |
| Anti-Chick IgY Alexa 568           | Goat                 | ThermoFisher Sci.    | 1:1000            |
| <b>Probes</b>                      |                      |                      |                   |
| <b>Probes</b>                      | <b>Target type</b>   | <b>Product size</b>  | <b>Company</b>    |
| <i>HOXA2</i>                       | Hindbrain positional | 107                  | ThermoFisher Sci. |
| <i>HOXA5</i>                       | Vagal positional     | 127                  | ThermoFisher Sci. |
| <i>HOXA7</i>                       | Trunk positional     | 131                  | ThermoFisher Sci. |
| <i>HOXA10</i>                      | Trunk positional     | 52                   | ThermoFisher Sci. |
| <i>HOXB7</i>                       | Trunk positional     | 66                   | ThermoFisher Sci. |
| <i>TFAP2<math>\alpha</math></i>    | NC lineage           | 73                   | ThermoFisher Sci. |
| <i><math>\beta</math>2M</i>        | Housekeeper          | 64                   | ThermoFisher Sci. |
| <b>Accession Number</b>            |                      |                      |                   |
|                                    |                      |                      | Hs00534579_m1     |
|                                    |                      |                      | Hs00430330_m1     |
|                                    |                      |                      | Hs00600844_m1     |
|                                    |                      |                      | Hs00172012_m1     |
|                                    |                      |                      | Hs04187556_m1     |
|                                    |                      |                      | Hs01029413_m1     |
|                                    |                      |                      | Hs00187842_m1     |

## Supplementary Figures

S1

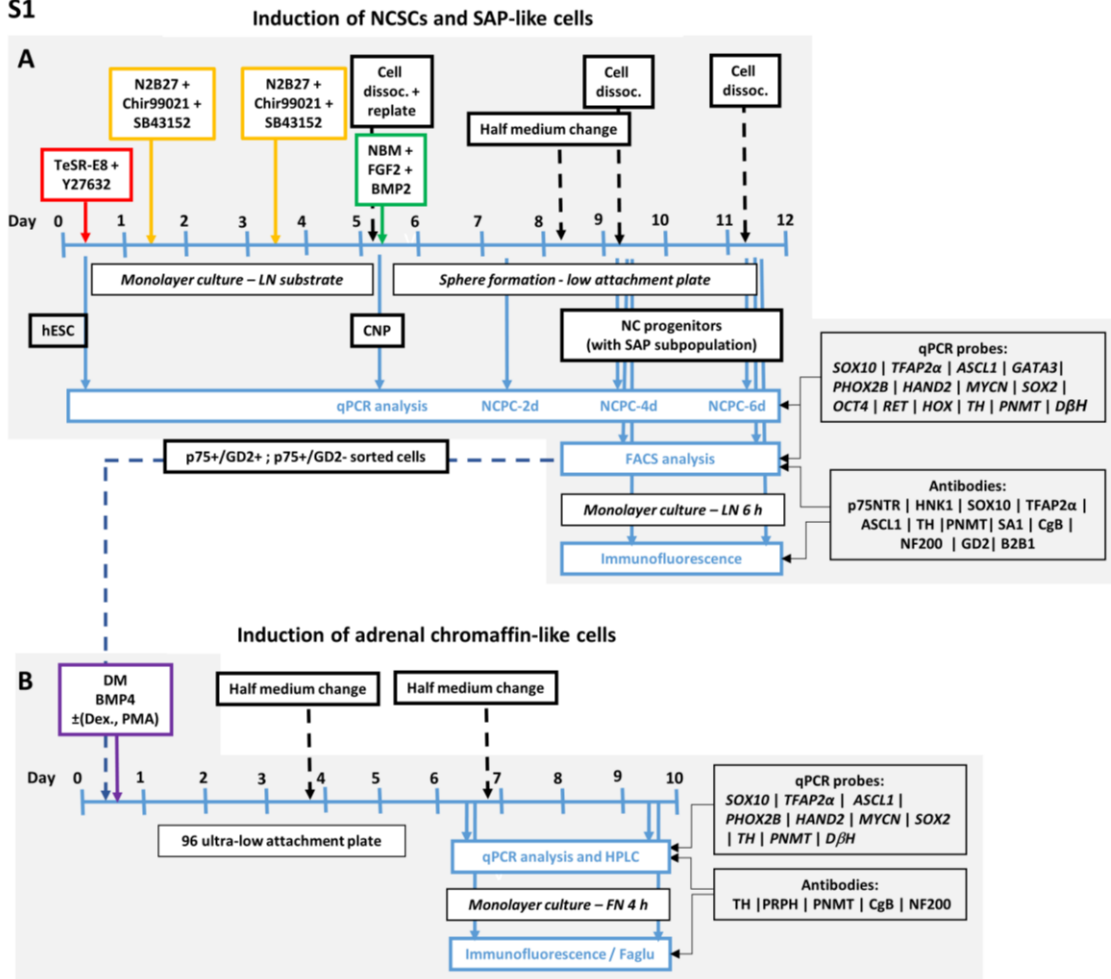

**Supplementary Figure S1.** (A & B) Schematic illustration of the differentiation protocol of human pluripotent cells to NCPC/SAP-like cells and further to chromaffin-like cells. Detailed extension of Figure 1A, B. **Related to time points in Figure 1.**

S2  
A

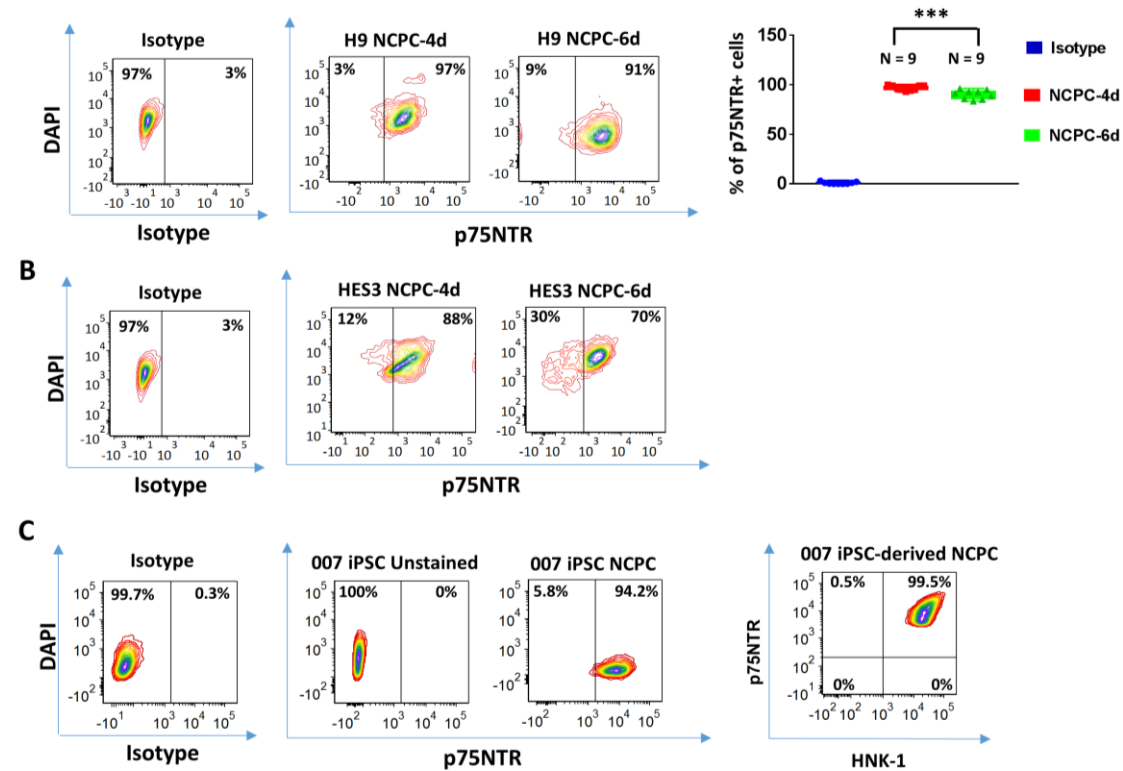

**Supplementary Figure S2. Induced human pluripotent cells express NC markers reliably and similarly in several cell lines. Related to Figure 1B.** (A) Proportion of p75NTR+ cells was very reproducible (9 separate NCPC-4d and -6d derivations of H9 cells). FACS analysis of (B) HES3 hESCs at NCPC-4d and -6d and (C) NCPC-6d only of 007 iPSC showing NCPC marker, p75NTR, similar to H9-derived cells. The p75NTR+ 007 cell population was used to gate for HNK-1 expression. Representative plots: NCPC-4d; N = 10 independent experiments and NCPC-6d; N = 10 independent experiments for HES3 hESC and NCPC-6d; N=4 independent experiments for 007 iPSC. Error bars represent mean  $\pm$  SEM. ns- not significant, \*P > 0.05, \*\*P > 0.01, \*\*\*P > 0.001, \*\*\*\*P > 0.0001.

S3

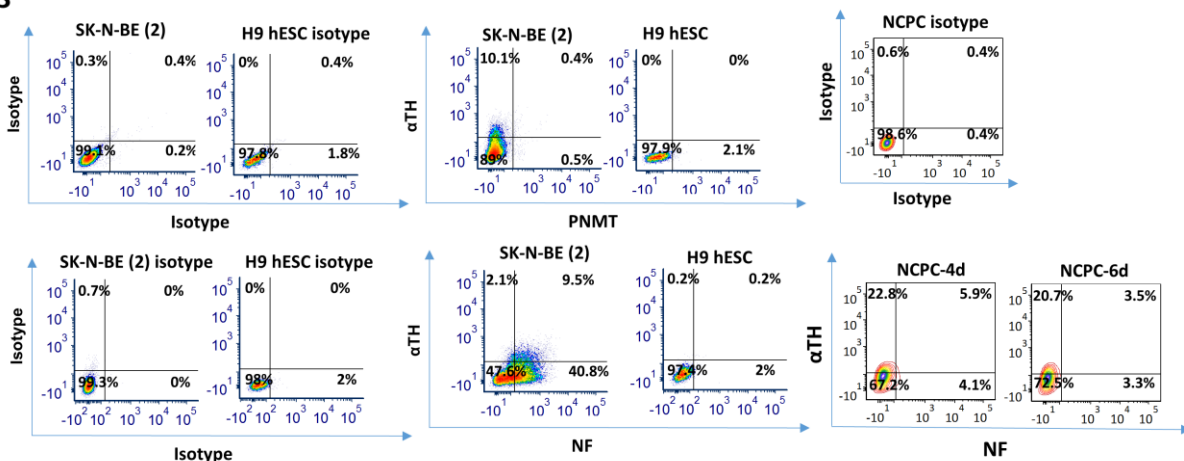

**Supplementary Figure S3. Neuroblastoma line SK-N-BE (2), negative control cells (H9 hESC) and NCPC-4d and 6d FACS analysed for  $\alpha$ TH, NF-200 kDa and PNMT. Related to Figure 2 and 4.** A representative FACS analysis of SK-N-BE (2) showing the expression of  $\alpha$ TH and NF-200 kDa with no expression of PNMT. H9 hESC showing no expression of  $\alpha$ TH, NF-200 kDa and PNMT. NCPC-4d and 6d showing an expression for  $\alpha$ TH and NF-200kDa. DAPI was used to gate for cells. N = 3 independent experiments for both cell types.

S4

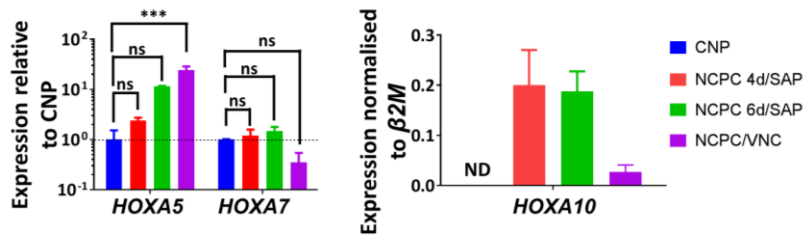

**Supplementary Figure S4. NCPC/SAP express higher number (trunk) *HOX* genes compared to NCPC/vagal NC. Related to Figure 2.** QPCR analysis of NCPC/SAP showing the increased expression of *HOXA7* and *HOXA10* trunk positional markers compared to NCPC/vagal NC with elevated *HOXA5* vagal positional marker. N = 3 independent experiments. Error bars represent mean  $\pm$  SEM. ns- not significant, \* $P > 0.05$ , \*\* $P > 0.01$ , \*\*\* $P > 0.001$ , \*\*\*\* $P > 0.0001$ .

S5

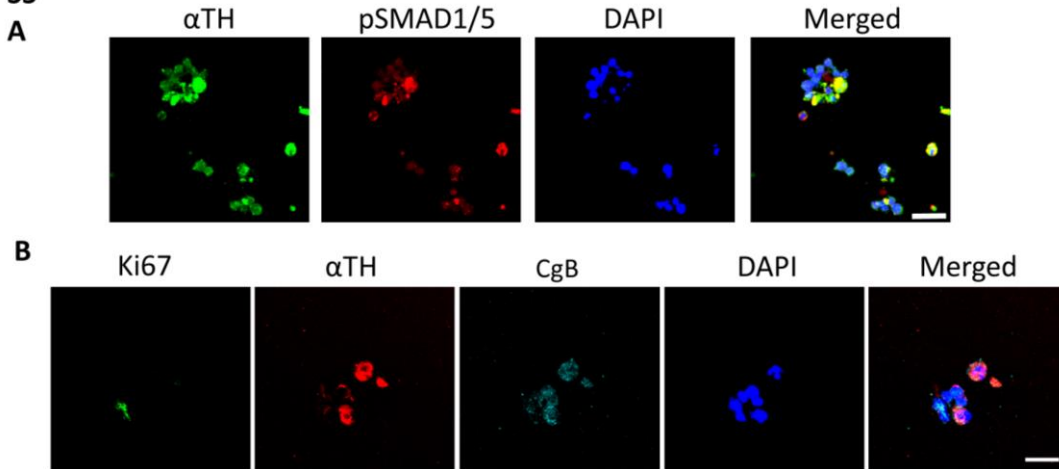

**Supplementary Figure S5. The downstream signaling effector of BMP4, SMAD1/5, is activated using 50 pg/mL of BMP4 in NCPC/SAP differentiation to chromaffin-like cells and these cells have limited proliferative capacity. Related to Figure 3.** (A) Immunofluorescence of chromaffin-like cells in vitro showing the expression of pSMAD1/5, and  $\alpha$ TH. Scale bar 20  $\mu$ m. (B) Immunofluorescence of nuclear Ki67 in  $\alpha$ TH<sup>+</sup>/CgB<sup>+</sup> chromaffin-like in a cell aggregate after 9 days chromaffin differentiation. Note that Ki67 signal here is in cells with low  $\alpha$ TH and CgB. Scale bar 20  $\mu$ m.



S6

A

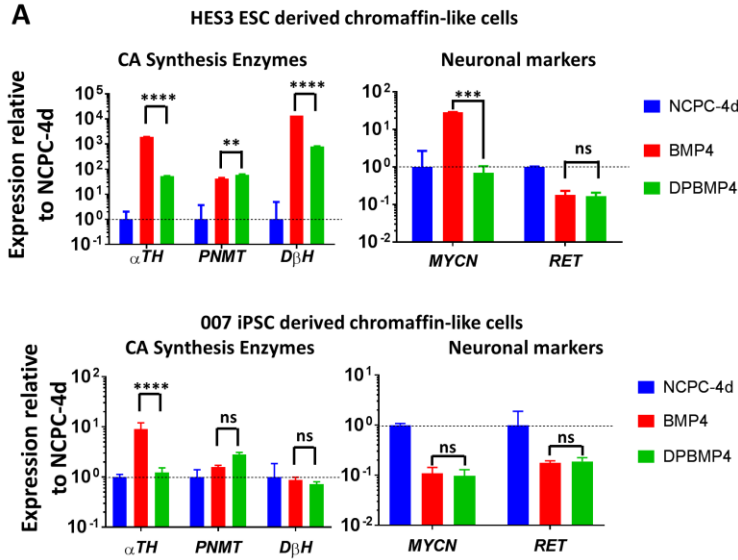

B

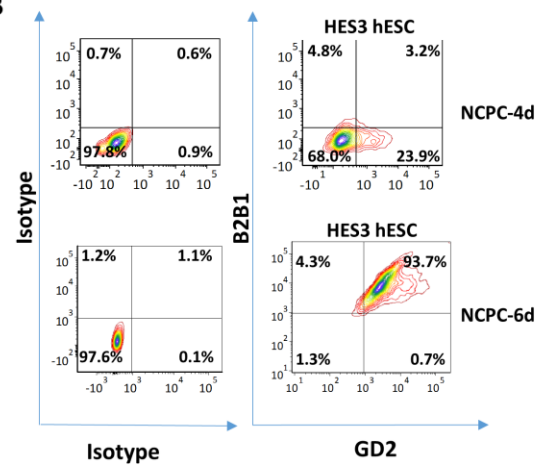

**Supplementary Figure S6. HES3 hESC- and 007 iPSC-derived in chromaffin induction conditions increase expression of mRNA of CA synthesizing enzymes and decrease expression of *RET* and HES3 hESC-derived NCPC cells express markers of SAP and pro-neuronal differentiation. Related to Figure 3 and 5. (A) CA enzyme mRNAs (especially with BMP4 alone) were upregulated similarly in HES3 and 007s (and H9s) with the exception of *DβH* in 007s. Neuronal differentiation marker *MYCN* was reduced in 007s paralleling that in H9s in contrast to upregulation with BMP4 in HES3 cells. The upregulation of *RET* mRNA seen in H9 cells was not shown in these cell lines. N = 3 independent experiments. Error bars represent mean ± SEM. ns- not significant, \* $P > 0.05$ , \*\* $P > 0.01$ , \*\*\* $P > 0.001$ , \*\*\*\* $P > 0.0001$ . (B) FACS analysis of HES3 NCPC-4d and -6d cells (initially gated by p75NTR expression). GD2 (SA lineage marker) appears in fewer NCPC-4d cells compared to H9 cells at the same stage, but later (NCPC-6d) many more HES3 GD2+ cells co-express the pro-neuronal marker B2B1, compared to H9-derived cells. Representative FACS plots: NCPC-4d, N = 10 and NCPC-6d, N = 10.**

S7

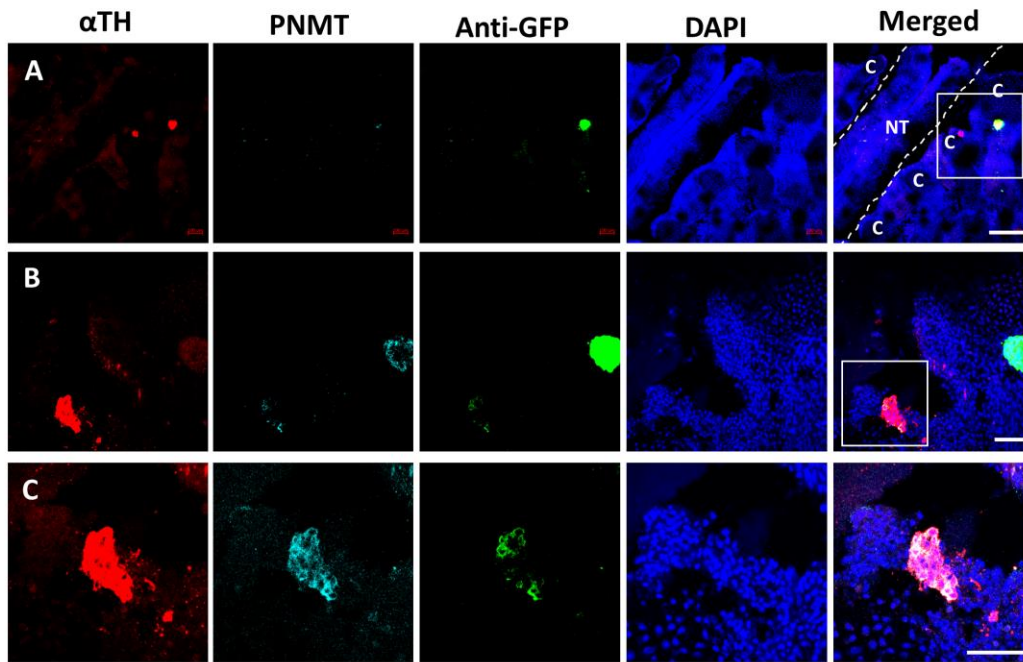

**Supplementary Figure S7. Transplanted NCPC/SAP cells *in vivo* integrate, migrate and differentiate into cells expressing chromaffin markers,  $\alpha$ TH and PNMT. Related to Figure 7.** (row A) Human GFP+ NCPC/SAP-like cells grafted into 2 day quail embryo trunk displace latero-ventrally and show SAP and chromaffin markers. Frontal-oblique section of ventral neural tube (NT) and somitic vertebral cartilage (C) in 4-day transplant. Scale bar 50  $\mu$ m. (row B) Boxed area in A is enlarged (next section ventral to A) to show human cells stained for  $\alpha$ TH and PNMT and identified with anti-GFP. Scale bar 250  $\mu$ m. (row C) Enlargement of area boxed in B showing co-expression of SAP and chromaffin markers. Scale bar 250  $\mu$ m.
